# Supplementary material for: Conservation Challenges Imposed by Evolutionary History and Habitat Suitability Shifts of Endangered Freshwater Mussels under a Global Climate Change Scenario
Source: MDPI journal article supplement (doi:10.3390/d16040209), 2024-03-29
Supplement: s1 [file s1]

# **Conservation challenges imposed by evolutionary history and habitat suitability shifts of endangered freshwater mussels under a global climate change scenario.**

Reis J.<sup>1</sup>, Perea S.<sup>1,2</sup>, Gama, M. <sup>3</sup>, Mendes S.L.<sup>1,4</sup>, Sousa V.C.<sup>4</sup>, Lima C.S.<sup>5</sup>, Banha, F. <sup>3</sup> Gil, M.<sup>1</sup>, Alvarez, M.G.<sup>1</sup>, Anastácio, P. <sup>3</sup>, Sousa-Santos C.<sup>5</sup>, Araujo R.<sup>6†</sup>,

## **Authors' addresses**

<sup>1</sup>*MARE - Marine and Environmental Sciences Centre/ARNET-Aquatic Research Network, Faculdade de Ciências da Universidade de Lisboa, Campo Grande, 1749-016 Lisbon, Portugal.*

<sup>2</sup>*Instituto de Biología, Departamento de Zoología, Universidad Nacional Autónoma de México, Tercer Circuito Exterior S/N. C.P. 04510. Ciudad de México, Mexico.*

<sup>3</sup>*MARE-Marine and Environmental Sciences Centre/ARNET - Aquatic Research Network.Universidade de Évora, Portugal.*

<sup>4</sup>*cE3c – Centre for Ecology, Evolution and Environmental Changes & CHANGE – Global Change and Sustainability Institute. Department of Animal Biology, Faculdade de Ciências da Universidade de Lisboa, Campo Grande, 1749-016 Lisboa, Portugal.*

<sup>5</sup> *MARE – Marine and Environmental Sciences Centre/ARNET-Aquatic Research Network. ISPA – Instituto Superior de Ciências Psicológicas, Sociais e da Vida. Rua Jardim do Tabaco, 34 - 1149-041 Lisboa, Portugal.*

<sup>6</sup> *Museo Nacional de Ciencias Naturales - CSIC, C/José Gutierrez Abascal, 2, 28006 Madrid, Spain.*

<sup>†</sup> Rafael Araujo is deceased.

**Corresponding author:**

Joaquim Reis

E-mail: [joaquim.reis@fc.ul.pt](mailto:joaquim.reis@fc.ul.pt)

Address: *MARE-Marine and Environmental Sciences Centre/ARNET-Aquatic Research Network, Faculdade de Ciências da Universidade de Lisboa, Campo Grande, 1749-016 Lisbon, Portugal.*

Telephone: (+351) 964723114

**Table S1** – Location, vouchers, and quality of genomic data (% missing data and mean depth coverage) for each sample.

| Basin          | Sub-basin | River/Sampling location (number of sampled/analyzed individuals after SNP-filtering) | Locality    | Sample name             | GenBank Accession Number (BioSample) (b) | % missing data | Mean depth coverage |
|----------------|-----------|--------------------------------------------------------------------------------------|-------------|-------------------------|------------------------------------------|----------------|---------------------|
| Sado           | Marateca  | Marateca 1 (5/5)                                                                     | Landeira    | TM1_2 <sup>(a)</sup>    | SRR28340993/<br>SAMN40447825             | 38.57          | 14.17               |
|                |           |                                                                                      |             | TM1_3 <sup>(a)</sup>    | SRR28340992/<br>SAMN40447826             | 41.63          | 12.49               |
|                |           |                                                                                      |             | TM1_4                   | SRR28340981/<br>SAMN40447827             | 36.40          | 14.34               |
|                |           |                                                                                      |             | TM1_8                   | SRR28340970/<br>SAMN40447828             | 37.37          | 14.31               |
|                |           |                                                                                      |             | TM1_12                  | SRR28340959/<br>SAMN40447829             | 34.94          | 15.37               |
|                |           | Marateca 2 (5/5)                                                                     | Landeira    | TM2_1 <sup>(a)</sup>    | SRR28340948/<br>SAMN40447830             | 45.77          | 10.05               |
|                |           |                                                                                      |             | TM2_8 <sup>(a)</sup>    | SRR28340937/<br>SAMN40447831             | 31.25          | 15.44               |
|                |           |                                                                                      |             | TM2_10                  | SRR28340936/<br>SAMN40447832             | 39.34          | 14.21               |
|                |           |                                                                                      |             | TM2_11                  | SRR28340935/<br>SAMN40447833             | 42.06          | 14.48               |
|                |           |                                                                                      |             | TM2_14                  | SRR28340934/<br>SAMN40447834             | 45.77          | 12.09               |
|                | Sado      | Sado (3/3)                                                                           | Torre Vã    | TS8_1 <sup>(a)</sup>    | SRR28340991/<br>SAMN40447835             | 36.52          | 13.56               |
|                |           |                                                                                      |             | TS8_2 <sup>(a)</sup>    | SRR28340990/<br>SAMN40447836             | 34.33          | 14.77               |
|                |           |                                                                                      |             | TS8_3                   | SRR28340989/<br>SAMN40447837             | 37.63          | 15.90               |
| Mira           | Torgal    | Torgal (5/3)                                                                         | Odemira     | T_Torg_1 <sup>(a)</sup> | SRR28340988/<br>SAMN40447838             | 25.42          | 12.72               |
|                |           |                                                                                      |             | T_Torg_2 <sup>(a)</sup> | SRR28340987/<br>SAMN40447839             | 82.48          | 5.74                |
|                |           |                                                                                      |             | T_Torg_3                | SRR28340986/<br>SAMN40447840             | 55.29          | 9.88                |
|                |           |                                                                                      |             | T_Torg_4                | SRR28340985/<br>SAMN40447841             | 26.12          | 13.17               |
|                |           |                                                                                      |             | T_Torg_5                | SRR28340984/<br>SAMN40447842             | 27.76          | 11.95               |
|                |           |                                                                                      |             |                         |                                          |                |                     |
| Lower Guadiana | Vascão    | Vascão 1 (5/2)                                                                       | Tavilhão    | 2.1-T1                  | SRR28340983/<br>SAMN40447843             | 31.94          | 14.09               |
|                |           |                                                                                      |             | 2.1-T2                  | SRR28340982/<br>SAMN40447844             | 28.83          | 12.89               |
|                |           |                                                                                      |             | 2.1-T7 <sup>(a)</sup>   | SRR28340980/<br>SAMN40447845             | 65.82          | 8.73                |
|                |           |                                                                                      |             | 2.1-T8 <sup>(a)</sup>   | SRR28340979/<br>SAMN40447846             | 53.49          | 18.65               |
|                |           |                                                                                      |             | 2.1-T9                  | SRR28340978/<br>SAMN40447847             | -              | 2.97                |
|                |           | Vascão 2 (5/3)                                                                       | Castelhanos | 1.1-T1 <sup>(a)</sup>   | SRR28340977/<br>SAMN40447848             | 39.16          | 9.98                |
|                |           |                                                                                      |             | 1.1-T3 <sup>(a)</sup>   | SRR28340976/<br>SAMN40447849             | 44.67          | 8.63                |
|                |           |                                                                                      |             | 1.1-T7                  | SRR28340975/<br>SAMN40447850             | 69.80          | 7.55                |
|                |           |                                                                                      |             |                         |                                          |                |                     |

|                |                    |                              |                          |                        |                              |       |       |
|----------------|--------------------|------------------------------|--------------------------|------------------------|------------------------------|-------|-------|
| Upper Guadiana | Odeleite           | Odeleite (5/5)               | Grainho                  | 1.1-T8                 | SRR28340974/<br>SAMN40447851 | -     | 3.41  |
|                |                    |                              |                          | 1.1-T9                 | SRR28340973/<br>SAMN40447852 | 38.93 | 9.91  |
|                |                    |                              |                          | 3.1-T1 <sup>(a)</sup>  | SRR28340972/<br>SAMN40447853 | 32.26 | 13.38 |
|                |                    |                              |                          | 3.1-T2                 | SRR28340971/<br>SAMN40447854 | 30.01 | 14.76 |
|                |                    |                              |                          | 3.1-T3 <sup>(a)</sup>  | SRR28340969/<br>SAMN40447855 | 32.08 | 14.97 |
|                |                    |                              |                          | 3.1-T4                 | SRR28340968/<br>SAMN40447856 | 27.56 | 15.60 |
|                |                    |                              |                          | 3.1-T9                 | SRR28340967/<br>SAMN40447857 | 28.48 | 14.02 |
|                |                    |                              |                          | 4.2-T2 <sup>(a)</sup>  | SRR28340966/<br>SAMN40447858 | 34.94 | 15.93 |
|                |                    |                              |                          | 4.2-T4 <sup>(a)</sup>  | SRR28340965/<br>SAMN40447859 | 28.20 | 14.33 |
|                |                    |                              |                          | 4.2-T5                 | SRR28340964/<br>SAMN40447860 | 61.93 | 17.65 |
|                | Chança             | Barranco do Vidigão<br>(6/4) | Vila Verde<br>de Ficalho | 4.2-T7                 | SRR28340963/<br>SAMN40447861 | 29.00 | 15.56 |
|                |                    |                              |                          | 4.2-T9                 | SRR28340962/<br>SAMN40447862 | 54.40 | 9.71  |
|                |                    |                              |                          | 4.2-D6                 | SRR28340961/<br>SAMN40447863 | 26.58 | 14.22 |
|                |                    |                              |                          | 2.2-T1 <sup>(a)</sup>  | SRR28340960/<br>SAMN40447864 | 87.23 | 4.65  |
|                |                    |                              |                          | TSPed_1 <sup>(a)</sup> | SRR28340958/<br>SAMN40447865 | 34.94 | 11.39 |
|                | Estena             | Estena(5/4)                  | Ciudad Real              | TECD_1 <sup>(a)</sup>  | SRR28340957/<br>SAMN40447866 | 48.32 | 8.98  |
|                |                    |                              |                          | TECD_2 <sup>(a)</sup>  | SRR28340956/<br>SAMN40447867 | 27.30 | 19.51 |
|                |                    |                              |                          | TECD_3                 | SRR28340955/<br>SAMN40447868 | 83.87 | 5.64  |
|                |                    |                              |                          | TENE_1 <sup>(a)</sup>  | SRR28340954/<br>SAMN40447869 | 39.39 | 10.84 |
|                |                    |                              | Navas de<br>Estena       | TENE_2 <sup>(a)</sup>  | SRR28340953/<br>SAMN40447870 | 46.43 | 9.66  |
|                |                    |                              |                          | TBul_1 <sup>(a)</sup>  | SRR28340952/<br>SAMN40447871 | 45.78 | 14.07 |
|                |                    |                              | El torno                 | TBul_2 <sup>(a)</sup>  | SRR28340951/<br>SAMN40447872 | 35.24 | 9.95  |
|                |                    |                              |                          | TBul_3                 | SRR28340950/<br>SAMN40447873 | 29.96 | 13.76 |
|                |                    |                              |                          | TBul_4                 | SRR28340949/<br>SAMN40447874 | 27.81 | 12.66 |
|                |                    |                              |                          | TBul_5                 | SRR28340947/<br>SAMN40447875 | 27.87 | 16.18 |
|                | Bullaque           | Bullaque (5/5)               | Castillo del<br>Milagro  | TMil_1 <sup>(a)</sup>  | SRR28340946/<br>SAMN40447876 | 27.45 | 16.77 |
|                |                    |                              |                          | TMil_2 <sup>(a)</sup>  | SRR28340945/<br>SAMN40447877 | 35.93 | 9.60  |
|                |                    |                              |                          | TMil_3                 | SRR28340944/<br>SAMN40447878 | 23.50 | 17.25 |
|                |                    |                              |                          | TMil_4                 | SRR28340943/<br>SAMN40447879 | 23.76 | 17.67 |
|                |                    |                              |                          | TRui_1                 | SRR28340942/<br>SAMN40447880 | 32.24 | 12.25 |
|                | Guadiana           | Guadiana (5/4)               | Lagunas de<br>Ruidera    |                        |                              |       |       |
|                |                    |                              |                          |                        |                              |       |       |
|                | Terges e<br>Cobres | Terges e Cobres<br>(1/0)     | Vale de<br>Russins       |                        |                              |       |       |
|                | Ardila             | São Pedro (1/1)              | Safara                   |                        |                              |       |       |

|        |                              |       |       |
|--------|------------------------------|-------|-------|
| TRui_2 | SRR28340941/<br>SAMN40447881 | 30.68 | 13.95 |
| TRui_3 | SRR28340940/<br>SAMN40447882 | 22.93 | 15.69 |
| TRui_4 | SRR28340939/<br>SAMN40447883 | 54.09 | 9.59  |
| TRui_5 | SRR28340938/<br>SAMN40447884 | 34.31 | 18.85 |

- 
- (a) samples used to build the catalog in stacks (M4m4n5, 2 individual/sub-basin).  
(b) GenBank Accession numbers (Biosample Accession) will be made available upon publication.

**Table S2.** Genetic diversity parameters at different hierarchical levels (basins, sub-basins, and population/location).

| Basin    | Sub-basins                  | population           | H <sub>exp</sub><br>(a) | H <sub>obs</sub><br>(b) | private<br>sites | %<br>polymorphic<br>sites | FIS (d) |
|----------|-----------------------------|----------------------|-------------------------|-------------------------|------------------|---------------------------|---------|
| Sado     | Sado (all)                  |                      | 0.108                   | 0.100                   | 7296             | 34.70                     | -       |
|          | Marateca                    | Marateca (all)       | 0.077                   | 0.086                   | 1628             | 21.90                     | -0.014  |
|          |                             | Marateca 1           | 0.077                   | 0.086                   | 97               | 17.74                     | -0.0097 |
|          |                             | Marateca 2           | 0.075                   | 0.086                   | 39               | 15.67                     | -0.0107 |
|          | Sado                        | Sado                 | 0.128                   | 0.143                   | 230              | 24.52                     | -0.0045 |
| Mira     | Torgal                      | Torgal               | 0.065                   | 0.073                   | 1427             | 13.48                     | -0.0099 |
| Guadiana | Guadiana (all)              |                      | 0.253                   | 0.143                   | 33494            | 87.53                     | -       |
|          | <i>Lower Guadiana (all)</i> |                      | 0.229                   | 0.121                   | 11101            | 63.56                     | -       |
|          | Odeleite                    | Odeleite             | 0.111                   | 0.120                   | 3377             | 25.78                     | -0.0073 |
|          | Vascão                      | Vascão (all)         | 0.109                   | 0.116                   | 3365             | 24.34                     | -0.0068 |
|          |                             | Vascão (Tavilhão)    | 0.097                   | 0.114                   | 278              | 16.00                     | -0.0056 |
|          |                             | Vascão (Castelhanos) | 0.104                   | 0.118                   | 379              | 18.94                     | -0.0050 |
|          | Chança                      | Barranco do Vidigao  | 0.119                   | 0.128                   | 1988             | 25.15                     | -0.0088 |
|          | <i>Upper Guadiana</i>       |                      | 0.225                   | 0.158                   | 9602             | 66.95                     | -       |
|          | Ardila                      | San Pedro            | 0.109                   | 0.167                   | 9                | 16.71                     | -       |
|          | Estena                      | Estena               | 0.138                   | 0.143                   | 427              | 27.64                     | 0.0028  |
|          | Bullaque                    | Bullaque (all)       | 0.192                   | 0.172                   | 1872             | 53.99                     | 0.0619  |
|          |                             | Milagro              | 0.181                   | 0.155                   | 245              | 38.60                     | 0.0536  |

---

|                  |       |       |      |       |        |
|------------------|-------|-------|------|-------|--------|
| Bullaque         | 0.184 | 0.185 | 259  | 41.53 | 0.0036 |
| Guadiana Ruidera | 0.135 | 0.150 | 1067 | 27.80 | -0.018 |

---

- (a) Expected heterozygosity.
- (b) Observed heterozygosity.
- (c) Nucleotide diversity.
- (d) Inbreeding coefficient.

**Table S3.** Genetic differentiation (FST pairwise comparisons) for 13 populations based on Weir and Cockerham's estimator.

|                                | Torgal | Sado  | Marateca<br>2 | Marateca<br>1 | Ruidera | Milagro | Bullaque | Estena | São<br>Pedro | Barranco do<br>Vidigão | Vascão<br>Castelhanos | Vascão<br>Tavilhão | Odeleite |
|--------------------------------|--------|-------|---------------|---------------|---------|---------|----------|--------|--------------|------------------------|-----------------------|--------------------|----------|
| <b>Torgal</b>                  | -      | 0.630 | 0.745         | 0.747         | 0.563   | 0.440   | 0.430    | 0.574  | 0.565        | 0.597                  | 0.676                 | 0.668              | 0.628    |
| <b>Sado</b>                    |        | -     | 0.183         | 0.218         | 0.561   | 0.357   | 0.351    | 0.450  | 0.325        | 0.548                  | 0.562                 | 0.541              | 0.561    |
| <b>Marateca 2</b>              |        |       | -             | -0.09         | 0.613   | 0.520   | 0.508    | 0.610  | 0.606        | 0.667                  | 0.697                 | 0.684              | 0.676    |
| <b>Marateca 1</b>              |        |       |               | -             | 0.598   | 0.494   | 0.485    | 0.602  | 0.606        | 0.655                  | 0.697                 | 0.681              | 0.661    |
| <b>Ruidera</b>                 |        |       |               |               | -       | 0.257   | 0.228    | 0.383  | 0.300        | 0.479                  | 0.498                 | 0.480              | 0.522    |
| <b>Milagro</b>                 |        |       |               |               |         | -       | 0.033    | 0.146  | 0.065        | 0.374                  | 0.367                 | 0.342              | 0.432    |
| <b>Bullaque</b>                |        |       |               |               |         |         | -        | 0.217  | 0.097        | 0.365                  | 0.365                 | 0.343              | 0.417    |
| <b>Estena</b>                  |        |       |               |               |         |         |          | -      | 0.297        | 0.441                  | 0.492                 | 0.479              | 0.476    |
| <b>São Pedro</b>               |        |       |               |               |         |         |          |        | -            | 0.348                  | 0.442                 | 0.437              | 0.402    |
| <b>Barranco do<br/>Vidigão</b> |        |       |               |               |         |         |          |        |              | -                      | 0.553                 | 0.526              | 0.558    |
| <b>Vascao<br/>Tavilhão</b>     |        |       |               |               |         |         |          |        |              |                        | -                     | -0.09              | 0.009    |



|                    |    |       |
|--------------------|----|-------|
| <b>Vascão</b>      | -  | 0.554 |
| <b>Castelhanos</b> |    |       |
| <b>Odeleite</b>    | 0. | -     |

---

\* value is significant after Bonferroni's correction (p-value = 0.0006).

**Table S4** – Analysis of Molecular Variance (AMOVA) to evaluate the partitioning of genetic variation (structure) among different sampling schemes, based on a pairwise distance matrix between samples.

| <b>Source of Variation</b>         | <b>d. f.</b> | <b>Sum of Squares</b> | <b>Variance Components</b> | <b>Percentage of Genetic Variation</b> |
|------------------------------------|--------------|-----------------------|----------------------------|----------------------------------------|
| Among sub-basins                   | 9            | 115380.930            | 944.36407                  | 43.98*                                 |
| Among locations within sub-basins  | 3            | 7107.994              | 215.26808                  | 10.02*                                 |
| Among individuals within locations | 44           | 19355.233             | -547.80855                 | -25.51                                 |
| within individuals                 | 57           | 87524.000             | 1535.50877                 | 71.51*                                 |
| Total                              | 113          | 229368.158            | 2147.33237                 |                                        |

\* significant at 0.05 p-level.

**Table S5** –Average Model evaluation using True skill statistic (TSS) for each of the algorithms and modelled taxa.

|         | <i>U. tumidiformis</i> |       | <i>Squalius</i> |      |
|---------|------------------------|-------|-----------------|------|
| Models* | Average                | SE    | Average         | SE   |
| SRE     | 0.792                  | 0.030 | 0.77            | 0.01 |
| CTA     | 0.962                  | 0.017 | 0.98            | 0.00 |
| RF      | 0.999                  | 0.000 | 0.99            | 0.00 |
| FDA     | 0.992                  | 0.001 | 0.96            | 0.00 |
| GLM     | 0.989                  | 0.005 | 0.97            | 0.01 |
| GBM     | 0.993                  | 0.003 | 0.98            | 0.00 |
| GAM     | 0.990                  | 0.007 | 0.99            | 0.00 |
| ANN     | 0.997                  | 0.001 | 0.99            | 0.00 |
| Average | 0.96                   | 0.01  | 0.95            | 0.00 |

\* Models computed: GLM (generalized linear model), GAM (generalized additive model), CTA (classification tree analysis), FDA (flexible discriminant analysis), ANN (artificial neural networks), RF (random forest for classification and regression), GBM (generalized boosted regression model) and SRE (surface range envelope).

**Table S6** – Percentage of suitable and unsuitable areas in the Iberian Peninsula for the selected taxa and the modeled timeframes and shared socioeconomic pathways (SSPs).

| Species                  | Timeframe | SSP | Suitable (%) | Unsuitable (%) | % reduction* |
|--------------------------|-----------|-----|--------------|----------------|--------------|
| <i>Unio tumidiformis</i> | Present   |     | 7.17         | 92.83          |              |
|                          | 2021-2040 | 245 | 0.11         | 99.89          | 99           |
|                          | 2021-2040 | 585 | 0.06         | 99.94          | 99           |
| <i>Squalius</i>          | Present   |     | 87.07        | 12.93          |              |
|                          | 2021-2040 | 245 | 81.37        | 18.63          | 19           |
|                          | 2021-2040 | 585 | 79.40        | 20.60          | 21           |
|                          | 2041-2060 | 245 | 67.30        | 32.70          | 33           |
|                          | 2061-2080 | 245 | 58.54        | 41.46          | 42           |
|                          | 2081-2100 | 245 | 79.16        | 20.84          | 21           |

\* Percentage reduction of suitable areas for each timeframe modelled when compared with current predictions.

**Figure S1.** Cross-entropy for each number of K ancestral populations inferred with sNMF.

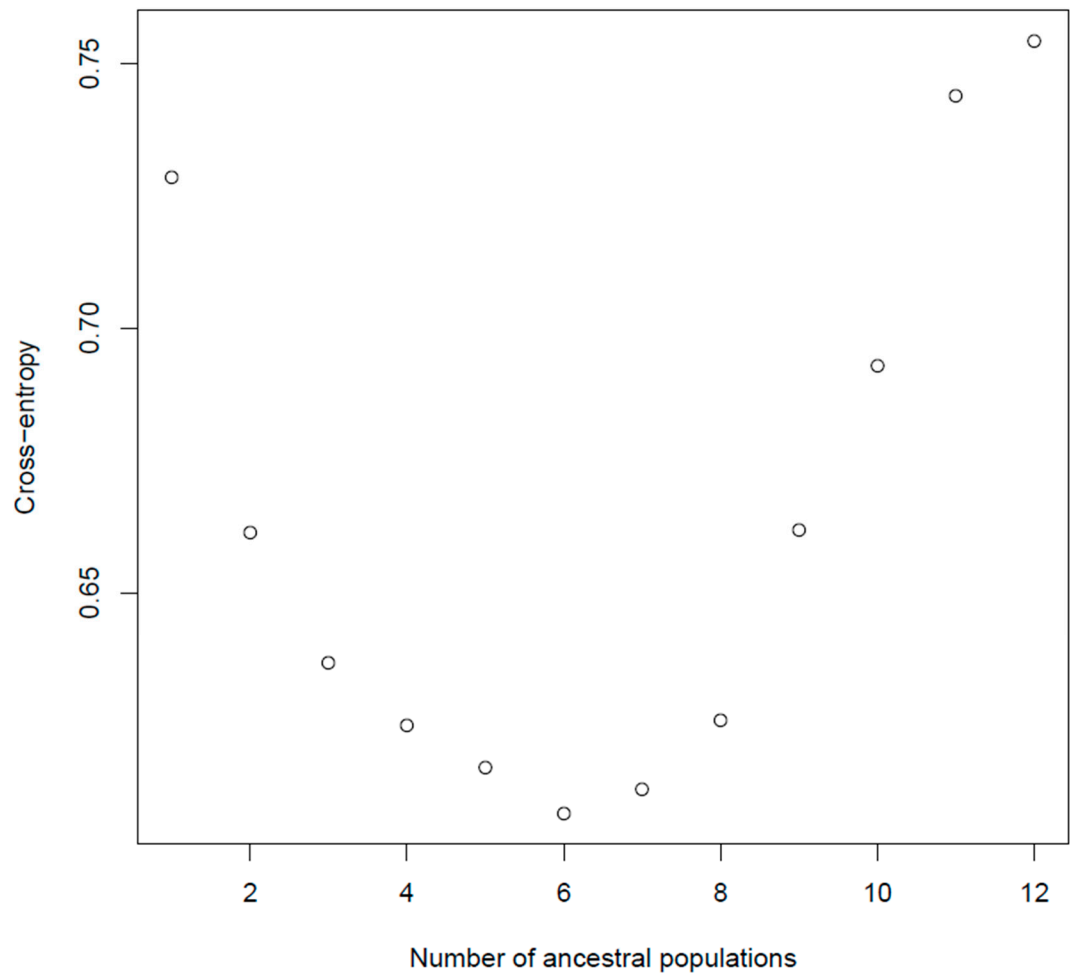

**Figure S2** - Relative importance of the eight environmental variables (BIO1 = Annual Mean Temperature; BIO12 = Annual Precipitation; BIO5 = Max Temperature of Warmest Month; BIO6 = Min Temperature of Coldest Month; BIO8 = Mean Temperature of Wettest Quarter; BIO9 = Mean Temperature of Driest Quarter; BIO13 = Precipitation of Wettest Month; BIO14 = Precipitation of Driest Month) used to predict the distribution of *U. tumidiformis* and its hosts.

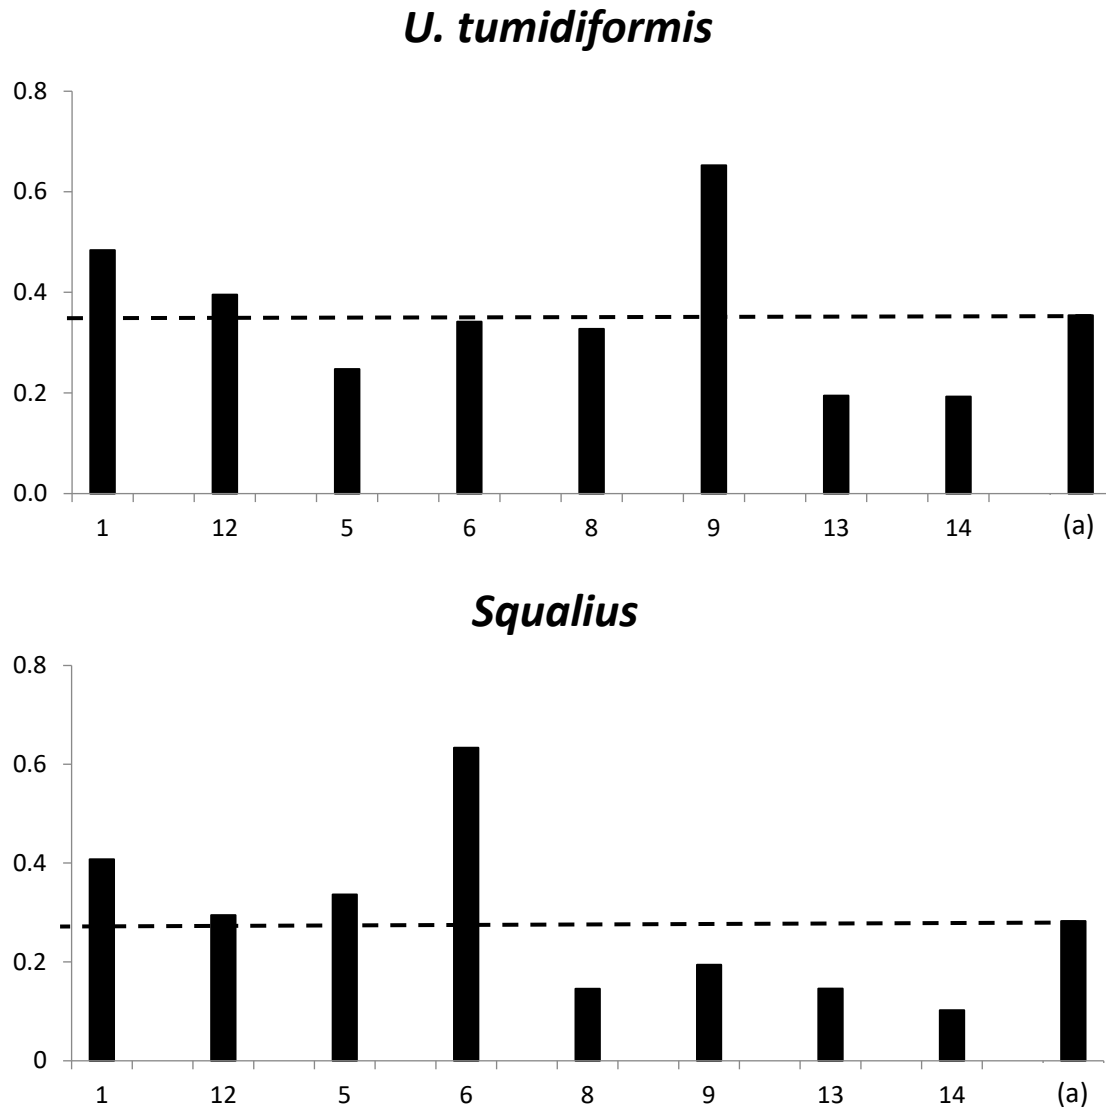

(a) The last column represents the mean value of relative importance obtained from eight different modelling algorithms. Individual variables with relative importance above this value (dashed line) were assumed as important in determining suitability according to the models used.
